# Supplementary material
Source: PubMed Central journal article supplement (PMC2034404)
Supplement: NIHMS31498-supplement-01.pdf [file NIHMS31498-supplement-01.pdf]

## Supplemental material

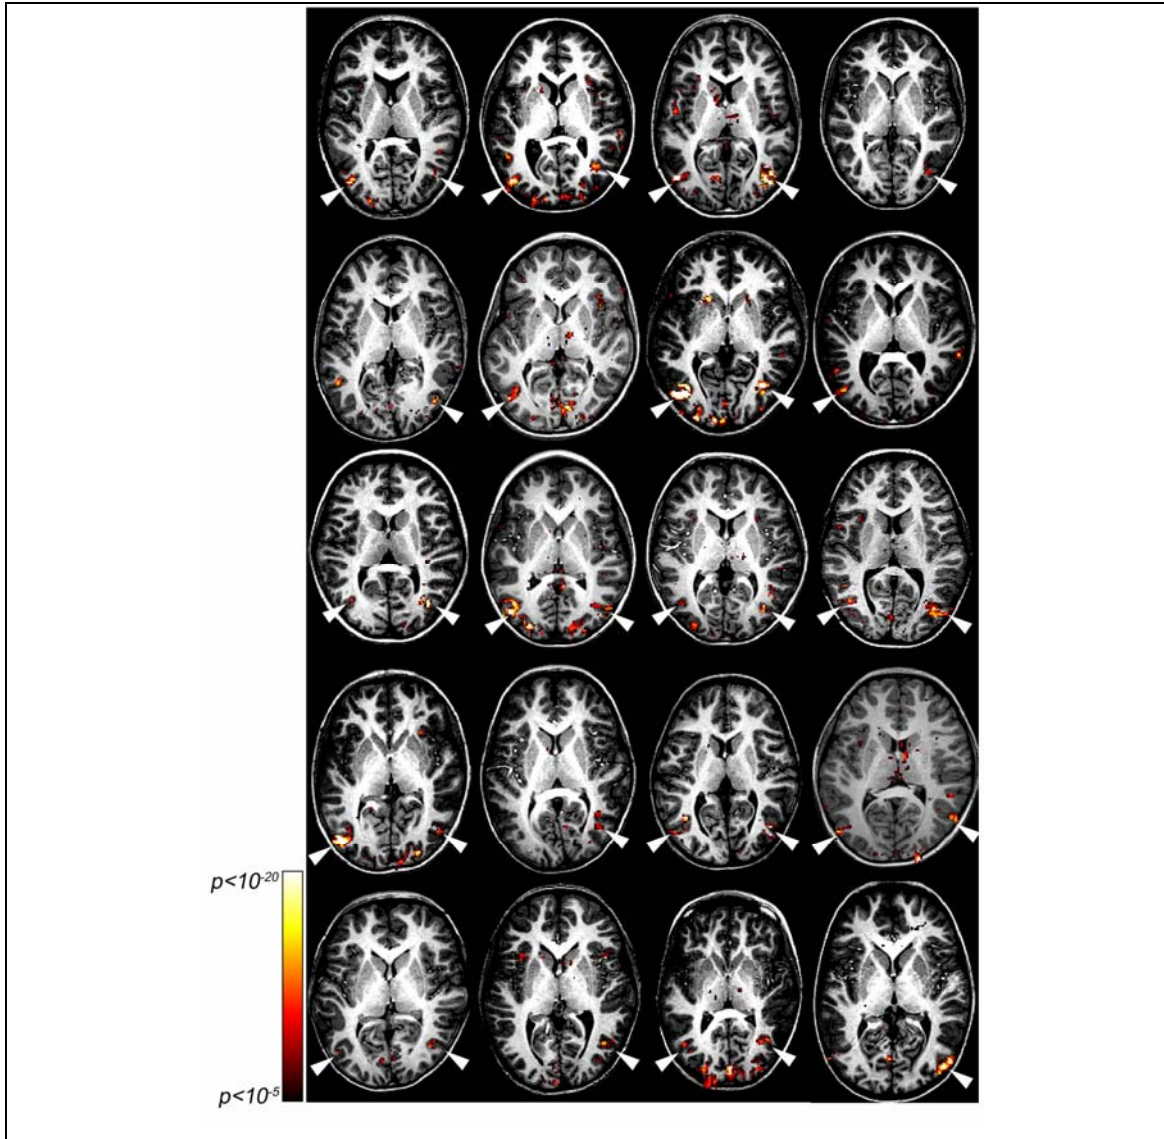

**Figure S1. MT+ activations in 20 children.** The MT+ localizer compared moving patterns (at 1.8%, 6.8%, 25% contrast) against fixation. A single slice at the center of the left or right MT+ ROI is shown for each child (see arrowheads). Mean MNI coordinates of MT+ center of mass across all 35 children: LMT+: [-50, -74, 10]; RMT+: [48, -71, 7] (see text for more detail). The threshold is  $p < 10^{-5}$  (uncorrected) for presentation purposes. In ROI definition, the threshold was lower ( $p < 10^{-3}$ ) to ensure some MT+ activation is found in both hemispheres in all 35 subjects.

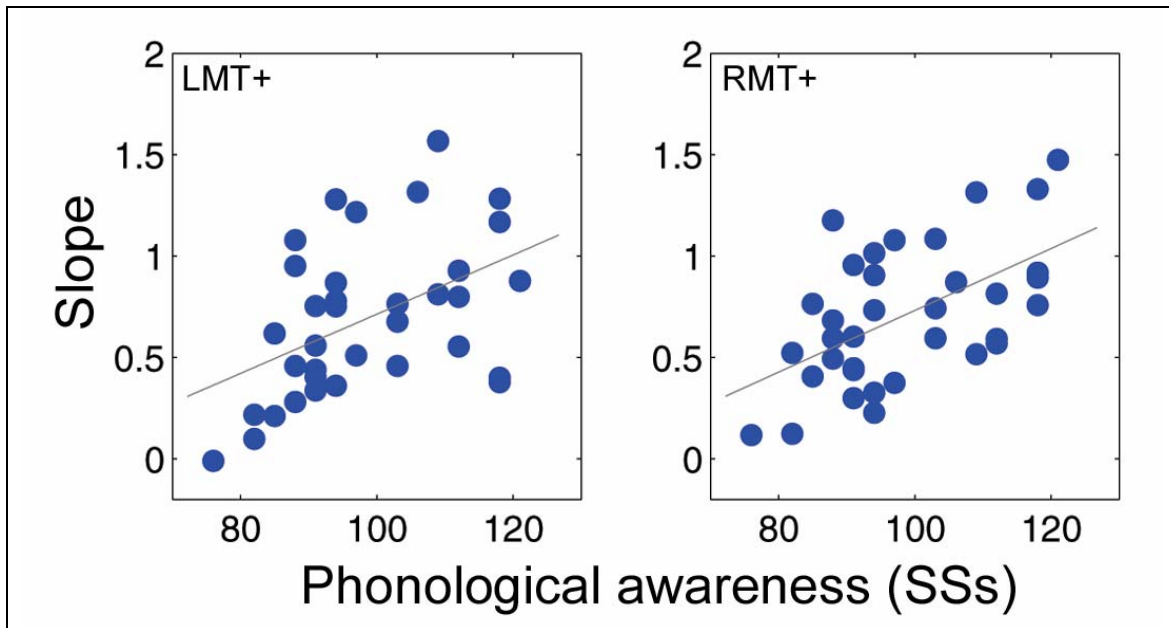

**Figure S2. Contrast responsivity in left and right MT+ correlates with phonological awareness.** The Y-axis shows the slope of a linear function through the mean BOLD contrast values plotted against log stimulus contrast. The X-axis shows phonological awareness Standardized scores (N=35). Shown in gray are linear regression lines through these values. The correlation between phonological awareness and contrast responsivity in left MT+ is  $r = 0.47$  ( $p < 0.005$ , uncorrected); in right MT+ the correlation is  $r = 0.55$  ( $p < 0.001$  uncorrected).

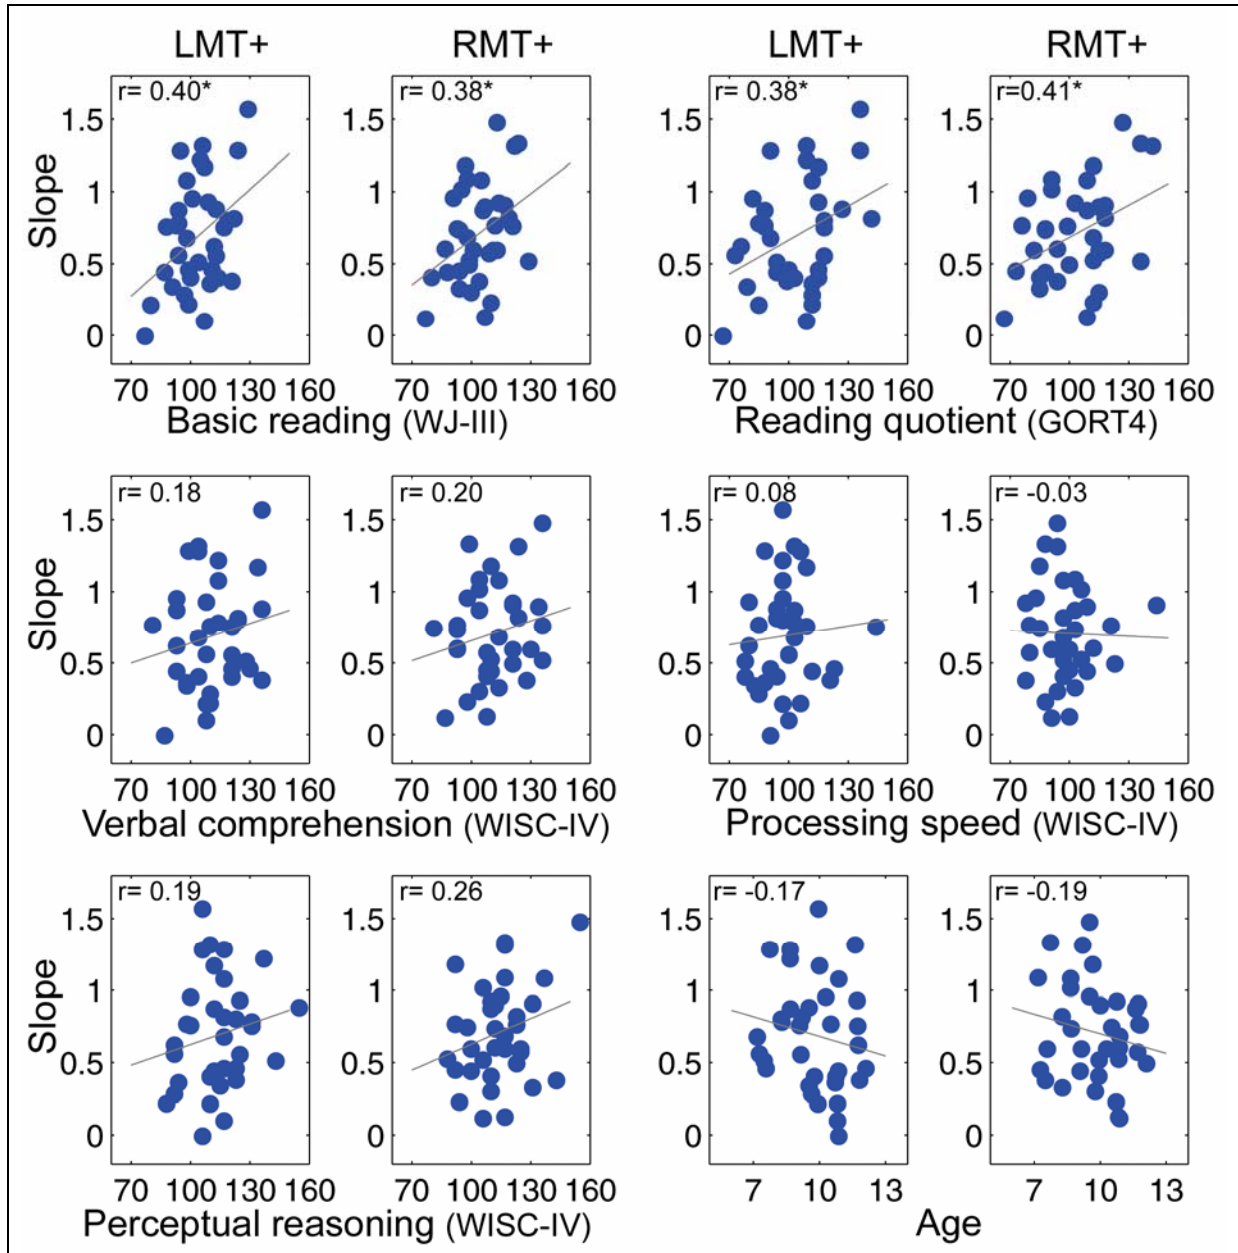

**Figure S3. Correlations between contrast responsivity (slope) in left/right MT+ and neuropsychological measures.** Significant correlations ( $p < 0.05$ , uncorrected) are marked with an asterisk.

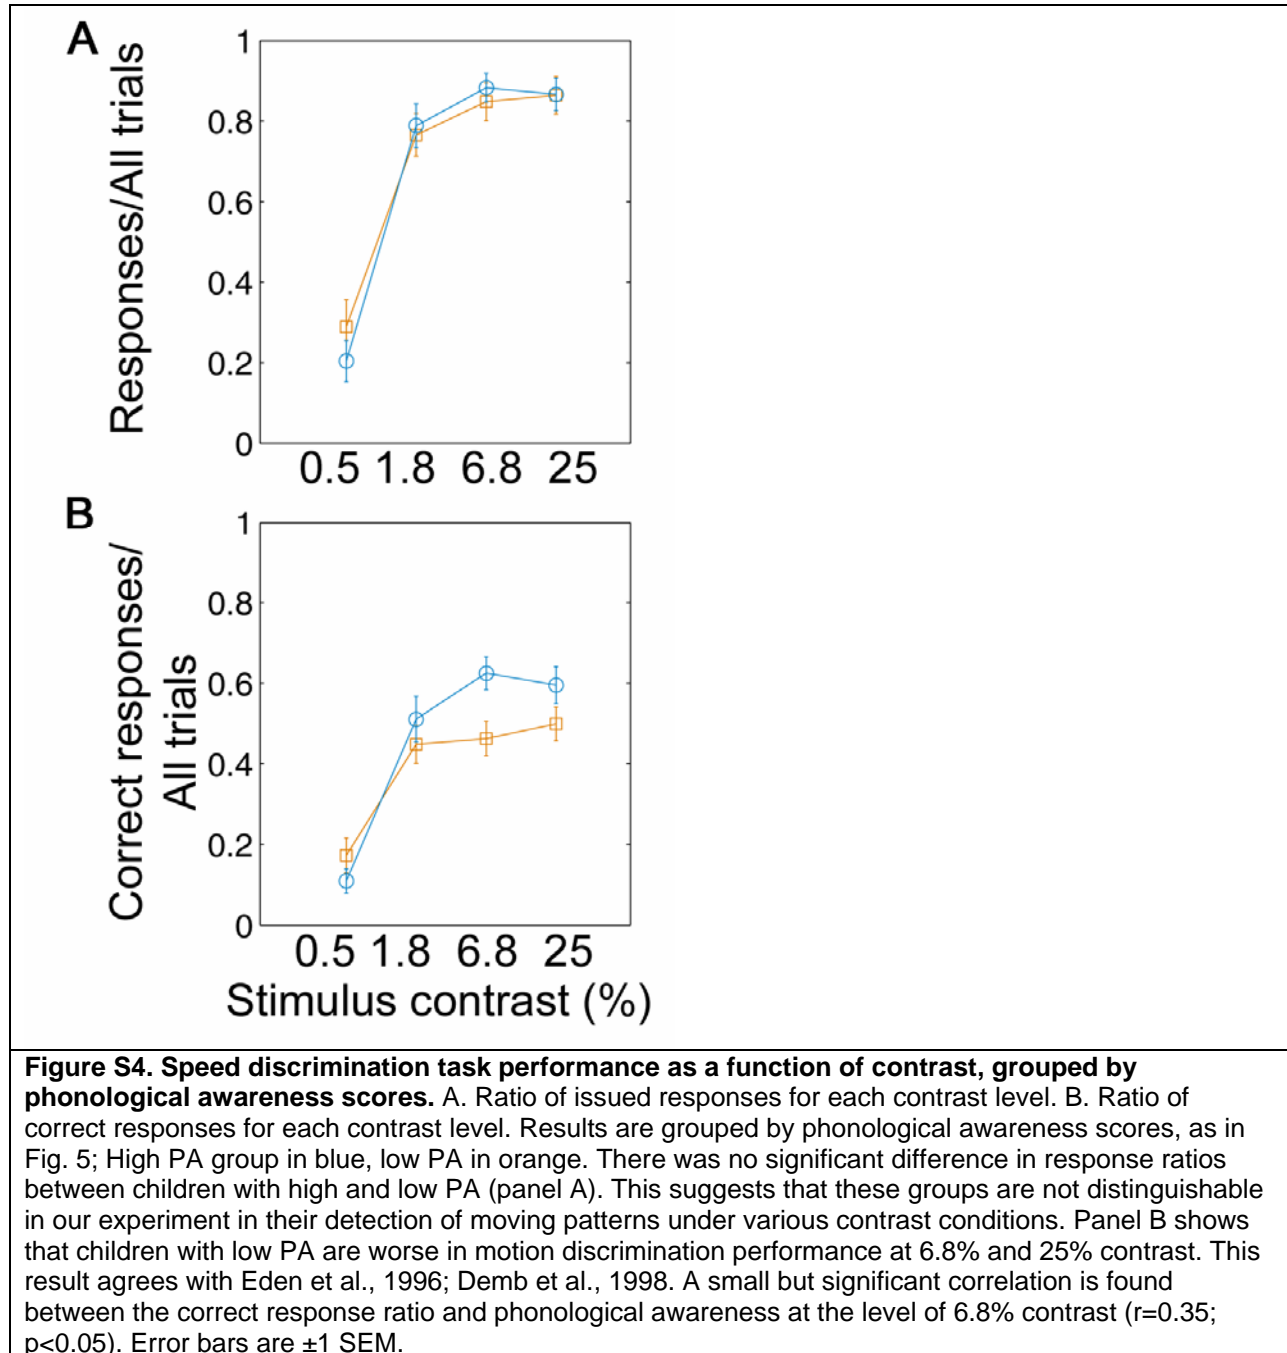

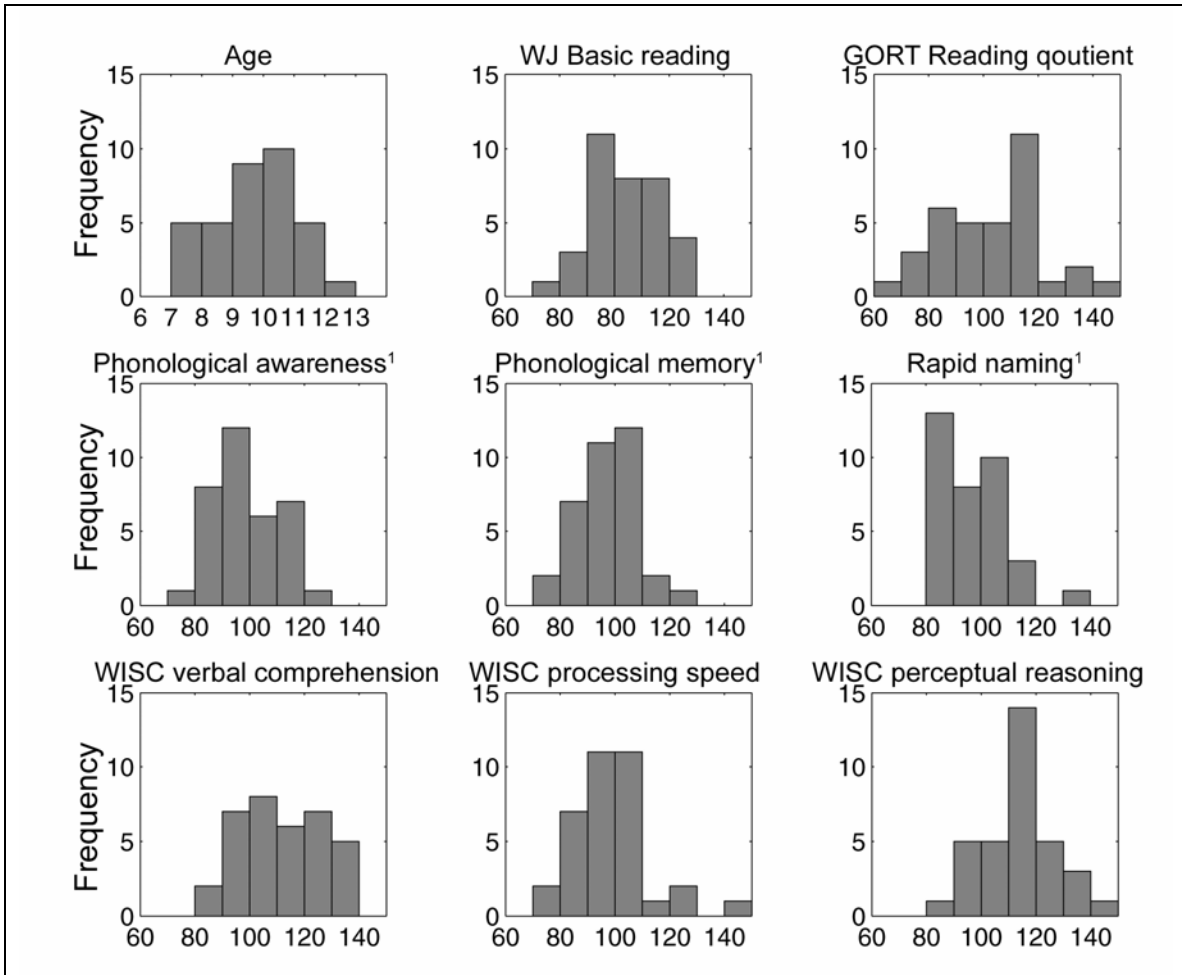

**Figure S5. Distributions of age and behavioral scores (standardized for age).** <sup>1</sup>Measured with the CTOPP battery. For general descriptions of the test batteries refer to Table S1.

**Table S1. Description of standardized tests and composite scores**

| Variable name                 | Test battery   | Task                                                                                       | Example                                                 |
|-------------------------------|----------------|--------------------------------------------------------------------------------------------|---------------------------------------------------------|
| Elision                       | CTOPP          | Remove a phoneme from an aurally presented word, say the remaining word.                   | Say 'brand'. Now say brand without saying /r/. (band)   |
| Blending                      | CTOPP          | Combine sounds to form a word                                                              | What word do these sounds make? /b/-/oi/. (boy)         |
| <b>Phonological Awareness</b> | <b>CTOPP</b>   | <b>Composite score: Elision + Blending</b>                                                 |                                                         |
| Memory for Digits             | CTOPP          | Repeat sequences of 2 to 8 non-repeating digits                                            | Listen carefully and repeat: 7 3 2 5 9                  |
| Nonword Repetition            | CTOPP          | Repeat auditory pronounceable nonwords (pseudowords)                                       | Listen to the made up word and repeat it: 'fos-ke-dool' |
| <b>Phonological Memory</b>    | <b>CTOPP</b>   | <b>Composite score: Memory for Digits + Nonword Repetition</b>                             |                                                         |
| Rapid Digit Naming            | CTOPP          | Name an array of 36 visual digits as fast as possible (Total time for two arrays)          |                                                         |
| Rapid Letter Naming           | CTOPP          | Name an array of 36 visual letters as fast as possible (Total time for two arrays)         |                                                         |
| <b>Rapid Naming</b>           | <b>CTOPP</b>   | <b>Composite score: Rapid Digit Naming + Rapid Letter Naming</b>                           |                                                         |
| Letter-Word Identification    | WJ-III         | Read aloud words of varying frequency, regularity and length                               | M ... for ... night ... could ... spoil ...             |
| Word Attack                   | WJ-III         | Read aloud pronounceable pseudowords                                                       | dap... vek... koarb... knofe...                         |
| <b>Basic Reading</b>          | <b>WJ-III</b>  | <b>Composite score: Letter-Word Identification + Word Attack</b>                           |                                                         |
| Rate                          | GORT4          | The time it takes to read a story                                                          |                                                         |
| Accuracy                      | GORT4          | Accuracy in pronouncing the words in the story                                             |                                                         |
| Fluency                       | GORT4          | Composite score: Rate + Accuracy                                                           |                                                         |
| Comprehension                 | GORT4          | Accuracy on comprehension questions regarding the story                                    |                                                         |
| <b>Oral reading quotient</b>  | <b>GORT4</b>   | <b>Composite score: Fluency + Comprehension</b>                                            |                                                         |
| Coding                        | WISC-IV        | The time it takes to transcribe symbols and match them to digits                           |                                                         |
| Symbol Search                 | WISC-IV        | The time it takes to search an array for matching symbols                                  |                                                         |
| <b>Processing Speed</b>       | <b>WISC-IV</b> | <b>Composite Score: Coding + Symbol Search</b>                                             |                                                         |
| Matrix Reasoning              | WISC-IV        | Analyzing the relationship of patterns                                                     |                                                         |
| Block Design                  | WISC-IV        | Arranging 2 color blocks to re-create a 2-dimensional design within a specified time limit |                                                         |
| <b>Perceptual Reasoning</b>   | <b>WISC-IV</b> | <b>Composite Score: Matrix Reasoning + Block Design</b>                                    |                                                         |
| Vocabulary                    | WISC-IV        | Provide definitions for words that the examiner reads aloud.                               |                                                         |
| Similarity                    | WISC-IV        | Describe the similarity between word pairs read aloud by the experimenter.                 |                                                         |
| <b>Verbal comprehension</b>   | <b>WISC-IV</b> | <b>Composite Score: Vocabulary + Similarity</b>                                            |                                                         |

**Table S2. Characteristics of the individuals shown in Figure 6**

|    | Age  | Gender | Phonological awareness | LMT+ slope | RMT+slope |
|----|------|--------|------------------------|------------|-----------|
| S1 | 9.9  | F      | 85                     | 0.21       | 0.41      |
| S2 | 9.8  | F      | 91                     | 0.40       | 0.30      |
| S3 | 7.3  | F      | 91                     | 0.56       | 0.45      |
| S4 | 10.9 | M      | 91                     | 0.44       | 0.60      |
| S5 | 7.6  | F      | 103                    | 0.46       | 0.59      |
| S6 | 7.2  | F      | 103                    | 0.68       | 1.08      |
| S7 | 11.7 | M      | 112                    | 0.93       | 0.57      |
| S8 | 9.5  | F      | 121                    | 0.88       | 1.48      |
